# Supplementary material for: Balancing the trade-off between the mechanical and electrical properties of conjugated polymer blend films for organic field-effect transistors
Source: Royal Society of Chemistry journal article supplement (doi:10.1039/d2tc01771g), 2022-01-01
Supplement: d2tc01771g1.pdf [file d2tc01771g1.pdf]

## Supporting Information

### **Balancing the trade-off between the mechanical and electrical properties of conjugated polymer blend films for organic field-effect transistors**

Hang Ren,<sup>a,b</sup> Yanhong Tong,<sup>b</sup> Mingzhao Ouyang,<sup>a</sup> Jiake Wang,<sup>a</sup> Lei Zhang,<sup>a</sup> Yuegang Fu,<sup>\*a</sup> and Qingxin Tang<sup>\*b</sup>

<sup>a</sup>Key Laboratory of Optoelectronic Measurement and Optical Information Transmission Technology, Ministry of Education, Changchun University of Science and Technology, Changchun 130022, China.

<sup>b</sup>Centre for Advanced Optoelectronic Functional Materials Research and Key Laboratory of UV-Emitting Materials and Technology, Ministry of Education, Northeast Normal University, Changchun 130024, China.

\* Corresponding author email: [tangqx@nenu.edu.cn](mailto:tangqx@nenu.edu.cn), [fuyg@cust.edu.cn](mailto:fuyg@cust.edu.cn)

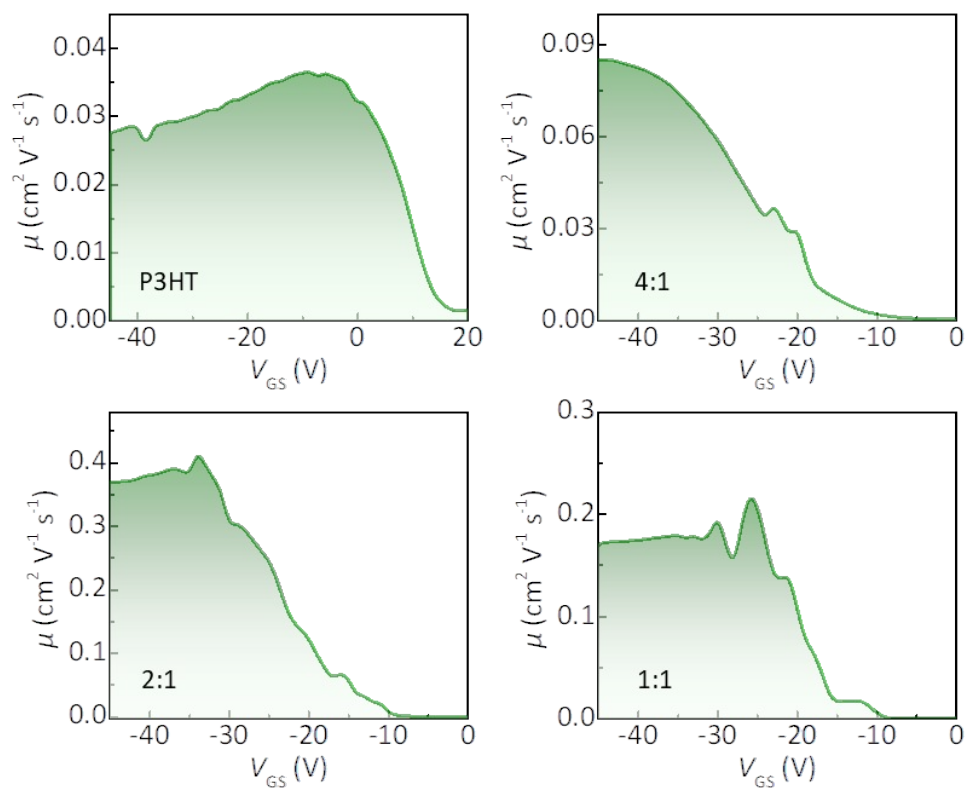

**Fig. S1.** Saturation mobility as a function of gate voltage for the OFETs with P3HT and P3HT:DPPT-TT blend films.

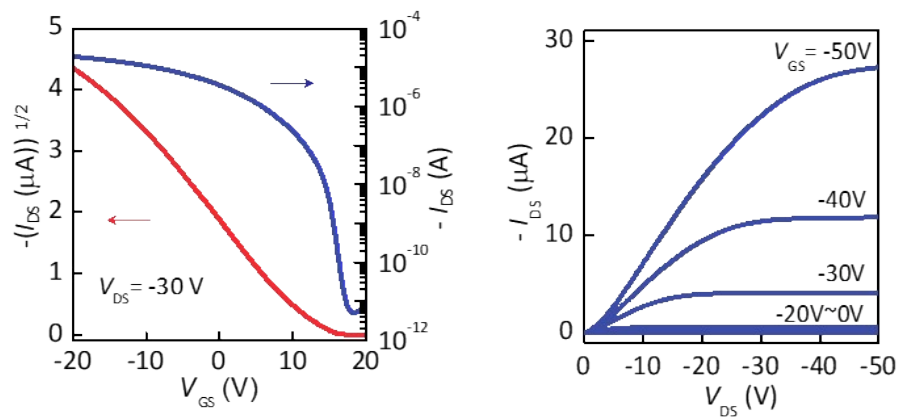

**Fig. S2.** Representative transfer and output characteristics of BGTC OFETs for the neat DPPT-TT film ( $L=50 \mu\text{m}$ ,  $W=1000 \mu\text{m}$ ).

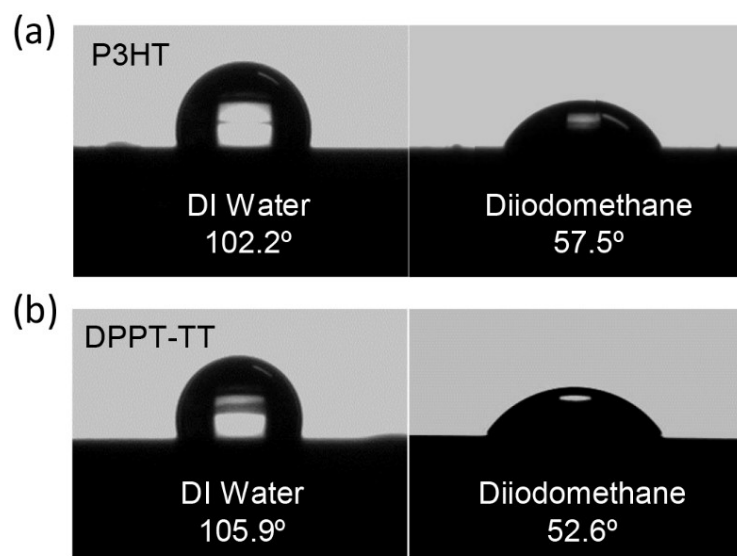

**Fig. S3.** Contact angles of DI water and diiodomethane on (a) P3HT and (b) DPPT-TT.

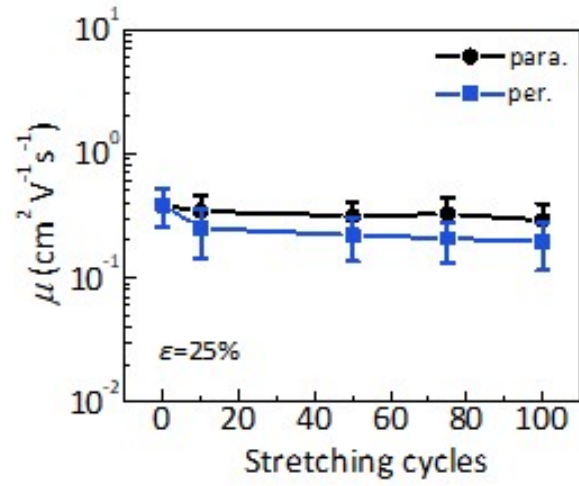

**Fig. S4.** Field-effect mobility versus number of stretching cycles at a strain of 25% perpendicular and parallel to the channel length direction.

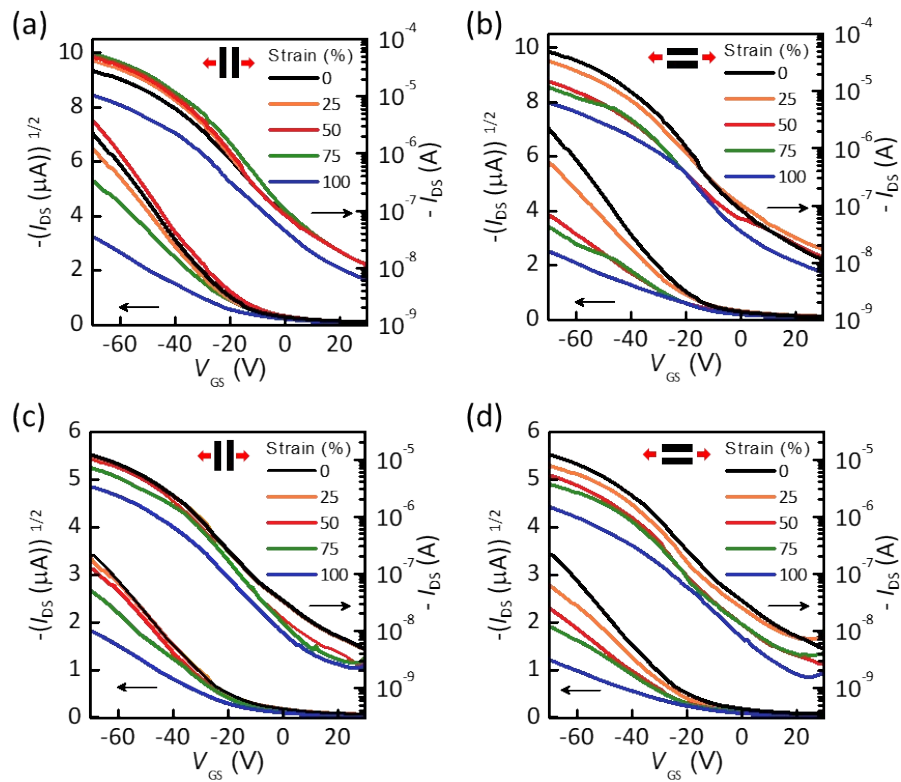

**Fig. S5.** Representative transfer (drain voltage: -30 V) characteristics of BGTC OFETs with (a,b) 50  $\mu\text{m}$  and (c,d) 200  $\mu\text{m}$  channel length under different tensile strains in parallel or perpendicular to the stretching direction.

**Table S1.** Electrical performance of the OFETs with a semiconductor layer of P3HT and P3HT:DPPT-TT blend films. 10 devices were measured for each type of OFET.

| Semiconductor | Crack-onset strain (%) | $\mu$ (cm <sup>2</sup> V <sup>-1</sup> s <sup>-1</sup> ) | $V_T$ (V) | $I_{on}/I_{off}$ |
|---------------|------------------------|----------------------------------------------------------|-----------|------------------|
| P3HT          | 105 ± 4                | 0.03 ± 0.01                                              | 14.75     | ~10 <sup>2</sup> |
| 4:1           | 104 ± 6                | 0.06 ± 0.04                                              | -15.82    | ~10 <sup>3</sup> |
| 2:1           | 100 ± 5                | 0.33 ± 0.16                                              | -15.79    | ~10 <sup>2</sup> |
| 1:1           | 50 ± 3                 | 0.21 ± 0.11                                              | -15.29    | ~10 <sup>4</sup> |
| 1:2           | 38 ± 4                 | 0.25 ± 0.14                                              | -14.75    | ~10 <sup>4</sup> |
| DPPT-TT       | 12 ± 2                 | 0.54 ± 0.22                                              | 13.11     | ~10 <sup>6</sup> |

**Table S2.** Electrical performance of the OFETs with stretchable P3HT thin films.

| Semiconductor        | $\mu_1$ (cm <sup>2</sup> /Vs) | $\varepsilon$ | $\mu_2$ (cm <sup>2</sup> /Vs) | Ref.                                                     |
|----------------------|-------------------------------|---------------|-------------------------------|----------------------------------------------------------|
| P3HT                 | $3.4 \times 10^{-2}$          | 100%          | $6.8 \times 10^{-3}$          | <i>Adv. Mater.</i> 2014, 26, 4253.                       |
| P3HT                 | $4.2 \times 10^{-3}$          | 100%          | $6.0 \times 10^{-4}$          | <i>Polymer</i> 2018, 155, 146–151.                       |
| P3HT:SIS             | $\sim 1.0 \times 10^{-2}$     | 100%          | $\sim 1.0 \times 10^{-3}$     | <i>Adv. Electron. Mater.</i> 2021, 2100591.              |
| P3HT:fluorine rubber | $1.1 \times 10^{-2}$          | 100%          | $2.3 \times 10^{-3}$          | <i>Polymer</i> 2018, 155, 146–151.                       |
| P3HT:PDMS            | $7.85 \times 10^{-3}$         | 100%          | $3.74 \times 10^{-4}$         | <i>Adv. Electron. Mater.</i> 2016, 2, 1500250.           |
| P3HT:PDMS            | 0.18                          | 100%          | \                             | <i>Chem. Mater.</i> 2016, 28, 1196–1204.                 |
| P3HT:PDMS            | 0.17                          | 100%          | 0.15                          | <i>Chem. Mater.</i> 2017, 29, 7645–7652.                 |
| P3HT:PCDTPT          | $\sim 0.8$                    | 75%           | $\sim 1.2$                    | <i>ACS Appl. Mater. Interfaces</i> 2016, 8, 14037–14045. |
| P3HT:DPPT-TT         | 0.33                          | 100%          | 0.08                          | Our work                                                 |
